# Supplementary material for: Effect of antioxidant supplementation on skeletal muscle and metabolic profile in aging mice
Source: Royal Society of Chemistry journal article supplement (doi:10.1039/d0fo02051f), 2021-01-01
Supplement: d0fo02051f1.pdf [file d0fo02051f1.pdf]

1 **Table S1.** Sequences of PCR primers used for gene expression analyses.

| Gene         |          | Primer sequences (5'-3') | Probe No. |
|--------------|----------|--------------------------|-----------|
| <i>Myh1</i>  | Forward: | CATGTCCAAAGCCAACAGTG     | #17       |
|              | Reverse: | CTGAGCCAGCTTCTTCTTGG     |           |
| <i>Myh2</i>  | Forward: | AGGCGGAAAGAAGCTACCAT     | #106      |
|              | Reverse: | GTGGTGATCAGCAGCATTTC     |           |
| <i>Myh4</i>  | Forward: | CCGAGCAAGAGCTACTGGA      | #17       |
|              | Reverse: | TGTTGATGAGGCTGGTGTC      |           |
| <i>Myh7</i>  | Forward: | AGGCCTGCATTGACCTCAT      | #105      |
|              | Reverse: | GAACATGCACTCCTCCTCAAG    |           |
| <i>Sod1</i>  | Forward: | CAGGACCTCATTTTAATCCTCAC  | #49       |
|              | Reverse: | TGCCCAGGTCTCCAACAT       |           |
| <i>Sod2</i>  | Forward: | TCAATGGTGGGGGACATATTA    | #22       |
|              | Reverse: | GCTTGATAGCCTCCAGCAAC     |           |
| <i>Gpx</i>   | Forward: | GTTTCCCGTGCAATCAGTTC     | #2        |
|              | Reverse: | CAGGTCCGACGTACTIONGAGG   |           |
| <i>Gapdh</i> | Forward: | GCCAAAAGGGTCATCATCTC     | #29       |
|              | Reverse: | CACACCCATCACAAACATGG     |           |

2

3
